# Supplementary material
Source: PubMed Central journal article supplement (PMC37245)
Supplement: nar_29_9_1898__1.pdf [file nar_29_9_1898__1.pdf]

## SUPPLEMENTARY MATERIAL

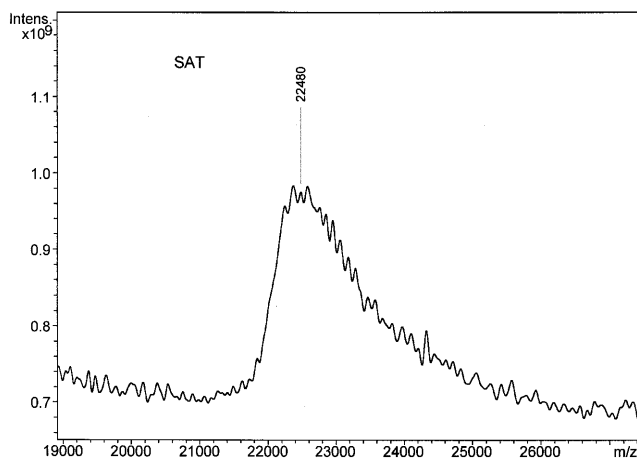

**Figure S1.** MALDI-TOF mass spectrum of the single-stranded 62 nt PCR product using pUC19 template and the triphosphates **9**, **11**, dCTP and dGTP. Full details of the experimental conditions of the PCR reaction and the sample preparation for mass spectrometry are given in the Materials and Methods.
